# Supplementary material for: A system biology approach highlights a hormonal enhancer effect on regulation of genes in a nitrate responsive "biomodule"
Source: PubMed Central journal article supplement (PMC2702358; doi:10.1186/1752-0509-3-59), 2009-06-06
Supplement: 1752-0509-3-59-S1.pdf [file 1752-0509-3-59-S1.pdf]

**Additional Table 1: Summary Table of C/N Datasets Used to Generate N-biclusters.** Growth and treatment conditions used in the C/N dataset to generate nitrogen responsive biclusters. The columns correspond to the lab from which the data originated, the identification given to that dataset for this analysis, the pretreatment conditions the plants in these studies were grown on (Carbon/Nitrogen conditions), the type of treatment as well as the time and organ of treatment and the reference for each dataset.

| Lab      | ID | # of Chips | Pretreat. Treatment                                                                  |                 |                                                            |            |       |        |           | Reference               |
|----------|----|------------|--------------------------------------------------------------------------------------|-----------------|------------------------------------------------------------|------------|-------|--------|-----------|-------------------------|
|          |    |            | Carbon/<br>Nitrogen                                                                  | Carbon          | Nitrogen                                                   | Time (HRs) | Organ |        |           |                         |
|          |    |            |                                                                                      |                 |                                                            |            | Roots | Shoots | Seedlings |                         |
| Crawford | N1 | 8          | High NH <sub>4</sub> -<br>succ/<br>Low<br>Sucrose                                    |                 | Low<br>KNO <sub>3</sub>                                    | 0.3        | +     | +      | -         | Wang et al<br>2003      |
| Crawford | N2 | 8          | High NH <sub>4</sub> -<br>succ/<br>Low<br>Sucrose                                    |                 | High KNO <sub>3</sub>                                      | 2          | +     | +      | -         | Wang et al<br>2004      |
| Stitt    | N3 | 14         | High NH <sub>4</sub> -<br>succ/<br>Low<br>Sucrose                                    | High<br>Sucrose | High KNO <sub>3</sub>                                      | 0.5; 3     | -     | -      | +         | Scheible et<br>al 2005  |
| Coruzzi  | N4 | 34         | Low<br>KNO <sub>3</sub>                                                              | High<br>Sucrose | High KNO <sub>3</sub>                                      | 8          | +     | -      | -         | Gutierrez<br>et al 2007 |
| Coruzzi  | N5 | 12         | Low<br>KNO <sub>3</sub><br>Low<br>NH <sub>4</sub> NO <sub>3</sub><br>High<br>Sucrose | High<br>Sucrose | High KNO <sub>3</sub> ,<br>NH <sub>4</sub> NO <sub>3</sub> | 8          | -     | -      | +         | Palenchar<br>et al 2004 |

**Additional Table 2: BioMaps Analysis of N-biclusters.** This table indicates the top over-represented category based on BioMaps analysis of N-biclusters. Top categories were those categories with the lowest p-value. The columns represent the individual N-bicluster number, the category name and the p-value for that category

| Bic # | Top Overrepresented Categories in Biclusters                                   | p-value  |
|-------|--------------------------------------------------------------------------------|----------|
| 0     | Cell Wall                                                                      | 0.00098  |
| 1     | Energy                                                                         | 3.77E-05 |
| 2     | Biosynthesis of Phenylpropanoids                                               | 0.00358  |
| 3     | two-component signal transduction system (e.g. response regulator component)   | 2.18E-06 |
| 4     | Energy                                                                         | 5.30E-14 |
| 5     | Cell Wall                                                                      | 9.78E-11 |
| 6     | Energy                                                                         | 6.90E-06 |
| 7     | None                                                                           | NA       |
| 8     | biosynthesis of asparagine                                                     | 0.04617  |
| 9     | Energy                                                                         | 1.99E-11 |
| 10    | Detoxification                                                                 | 0.00032  |
| 11    | None                                                                           | NA       |
| 12    | Transport Mechanism                                                            | 0.01944  |
| 13    | Cell Wall                                                                      | 0.03601  |
| 14    | Disease, virulence and defense                                                 | 0.00177  |
| 15    | Amino Acid Biosynthesis                                                        | 0.00403  |
| 16    | Storage Protein                                                                | 0.01905  |
| 17    | None                                                                           | NA       |
| 18    | Ribosomal Proteins                                                             | 6.58E-13 |
| 19    | biosynthesis of secondary products derived from L-phenylalanine and L-tyrosine | 0.03256  |
| 20    | None                                                                           | NA       |

**Additional Table 3. N-bicluster 9 gene list.** Indicated here are the AGI identification for each gene, the TAIR 8 gene annotation for gene function and whether the gene is present in the initial 5 N/H biclusters considered in this analysis.

| AGI       | TAIR 8 Annotation                                                      | Significant N/H-bicluster Membership |
|-----------|------------------------------------------------------------------------|--------------------------------------|
| At1g78050 | phosphoglycerate/bisphosphoglycerate mutase family protein             | NA                                   |
| At2g30670 | tropinone reductase, putative / tropine dehydrogenase, putative        | NA                                   |
| At2g42350 | zinc finger (C3HC4-type RING finger) family protein                    | NA                                   |
| At5g48850 | male sterility MS5 family protein                                      | NA                                   |
| At3g46130 | MYB111 (myb domain protein 111)                                        | NA                                   |
| At2g48080 | oxidoreductase, 2OG-Fe(II) oxygenase family protein                    | NA                                   |
| At4g38340 | RWP-RK domain-containing protein                                       | NA                                   |
| At1g16170 | similar to unknown protein                                             | NA                                   |
| At1g48600 | phosphoethanolamine N-methyltransferase 2, putative (NMT2)             | NA                                   |
| At5g67420 | LBD37 (LOB DOMAIN-CONTAINING PROTEIN 37)                               | NA                                   |
| At4g31910 | transferase family protein                                             | NA                                   |
| At5g04950 | nicotianamine synthase, putative                                       | NA                                   |
| At5g06570 | hydrolase                                                              | NA                                   |
| At5g19970 | similar to unknown protein                                             | NA                                   |
| At5g62710 | leucine-rich repeat family protein / protein kinase family protein     | NA                                   |
| At1g37130 | NIA2 (NITRATE REDUCTASE 2)                                             | NA                                   |
| At5g66530 | aldose 1-epimerase family protein                                      | NA                                   |
| At5g64550 | loricrin-related                                                       | NA                                   |
| At1g24280 | G6PD3 (GLUCOSE-6-PHOSPHATE DEHYDROGENASE 3)                            | NA                                   |
| At4g39770 | trehalose-6-phosphate phosphatase, putative                            | NA                                   |
| At1g60140 | ATTPS10 (TREHALOSE PHOSPHATE SYNTHASE)                                 | NA                                   |
| At5g13110 | G6PD2 (GLUCOSE-6-PHOSPHATE DEHYDROGENASE 2)                            | NA                                   |
| At4g38470 | protein kinase family protein                                          | NA                                   |
| At5g40850 | UPM1 (UROPHORPHYRIN METHYLASE 1); uroporphyrin-III C-methyltransferase | NA                                   |
| At3g17510 | CIPK1 (CBL-INTERACTING PROTEIN KINASE 1)                               | NA                                   |
| At5g50200 | WR3 (WOUND-RESPONSIVE 3); nitrate transmembrane transporter, NRT3.1    | NA                                   |
| At3g16560 | protein phosphatase 2C-related / PP2C-related                          | NA                                   |
| At3g50900 | similar to unknown protein                                             | NA                                   |
| At1g70410 | carbonic anhydrase, putative / carbonate dehydratase, putative         | NA                                   |
| At1g43710 | EMB1075 (EMBRYO DEFECTIVE 1075); carboxy-lyase                         | NA                                   |
| At5g37260 | CIR1/RVE2 (CIRCADIAN 1)                                                | NA                                   |
| At4g40070 | protein binding / zinc ion binding                                     | NA                                   |
| At2g30040 | MAPKKK14 (Mitogen-activated protein kinase kinase kinase 14)           | NA                                   |
| At1g08650 | PPCK1 (PHOSPHOENOLPYRUVATE CARBOXYLASE KINASE)                         | NA                                   |
| At4g09620 | similar to unknown protein                                             | NA                                   |
| At2g16060 | AHB1 (ARABIDOPSIS HEMOGLOBIN 1)                                        | NA                                   |
| At1g74030 | enolase, putative                                                      | NA                                   |
| At4g37610 | BT5 (BTB and TAZ domain protein 5)                                     | NA                                   |
| At5g57660 | zinc finger (B-box type) family protein                                | NA                                   |
| At3g03040 | F-box family protein                                                   | NA                                   |
| At1g73920 | lipase family protein                                                  | NA                                   |
| At1g80440 | kelch repeat-containing F-box family protein                           | NA                                   |
| At1g25550 | myb family transcription factor                                        | NA                                   |
| At4g24620 | PGI1 (CHLOROPLASTIC PHOSPHOGLUCOSE ISOMERASE)                          | NA                                   |

|                  |                                                                                                                                       |    |
|------------------|---------------------------------------------------------------------------------------------------------------------------------------|----|
| <b>At1g21010</b> | similar to unknown protein                                                                                                            | NA |
| <b>At1g23870</b> | ATTPS9 (Arabidopsis thaliana trehalose-phosphatase/synthase 9)                                                                        | NA |
| <b>At1g08090</b> | ATNRT2:1 (Arabidopsis thaliana high affinity nitrate transporter 2.1)                                                                 | NA |
| <b>At3g52360</b> | similar to unknown protein                                                                                                            | NA |
| <b>At5g07680</b> | ANAC079/ANAC080/ATNAC4 (Arabidopsis NAC domain containing protein 79, Arabidopsis NAC domain containing protein 80)                   | NA |
| <b>At4g34750</b> | auxin-responsive protein, putative / small auxin up RNA (SAUR_E)                                                                      | NA |
| <b>At5g15830</b> | ATBZIP3 (ARABIDOPSIS THALIANA BASIC LEUCINE-ZIPPER 3)                                                                                 | NA |
| <b>At5g47560</b> | ATSDAT/ATTD1 (TONOPLAST DICARBOXYLATE TRANSPORTER)                                                                                    | NA |
| <b>At1g62180</b> | APR2 (5'ADENYLYLPHOSPHOSULFATE REDUCTASE 2)                                                                                           | NA |
| <b>At1g22500</b> | zinc finger (C3HC4-type RING finger) family protein                                                                                   | NA |
| <b>At1g67920</b> | similar to unknown protein                                                                                                            | NA |
| <b>At1g30510</b> | ATRFNR2 (ROOT FNR 2); oxidoreductase                                                                                                  | NA |
| <b>At1g80310</b> | sulfate transmembrane transporter                                                                                                     | NA |
| <b>At5g53460</b> | GLT1 (NADH-dependent glutamate synthase 1 gene)<br>CYP707A3 (cytochrome P450, family 707, subfamily A, polypeptide 3); oxygen binding | NA |
| <b>At5g45340</b> | similar to unknown protein                                                                                                            | NA |
| <b>At5g54970</b> | glycosyl hydrolase family 17 protein                                                                                                  | NA |
| <b>At3g13560</b> | ASN2 (ASPARAGINE SYNTHETASE 2); asparagine synthase (glutamine-hydrolyzing)                                                           | NA |
| <b>At5g65010</b> | ATRR3 (RESPONSE REGULATOR 3); transcription regulator                                                                                 | NA |
| <b>At2g41310</b> | PPCK2 (PHOSPHOENOLPYRUVATE CARBOXYLASE KINASE 2)                                                                                      | NA |
| <b>At3g04530</b> | ACA4 (AUTO-INHIBITED CA(2+)-ATPASE, ISOFORM 4); calcium-transporting ATPase/ calmodulin binding                                       | NA |
| <b>At2g41560</b> | ATPPC3 (PHOSPHOENOLPYRUVATE CARBOXYLASE 3)                                                                                            | NA |
| <b>At3g14940</b> | pyridoxal-dependent decarboxylase family protein                                                                                      | NA |
| <b>At1g27980</b> | similar to unknown protein                                                                                                            | NA |
| <b>At4g26130</b> | 6-phosphogluconate dehydrogenase family protein                                                                                       | NA |
| <b>At5g41670</b> | ATTPPA (Arabidopsis thaliana trehalose-6-phosphate phosphatase)                                                                       | NA |
| <b>At5g51460</b> | similar to unknown protein                                                                                                            | NA |
| <b>At4g34560</b> | male sterility MS5 family protein                                                                                                     | NA |
| <b>At1g04770</b> | AAA-type ATPase family protein                                                                                                        | NA |
| <b>At3g28510</b> | ABC transporter family protein                                                                                                        | NA |
| <b>At1g31770</b> | CYP90D1 (CYTOCHROME P450, FAMILY 90, SUBFAMILY D, POLYPEPTIDE 1)                                                                      | NA |
| <b>At3g13730</b> | similar to unknown protein                                                                                                            | NA |
| <b>At3g19030</b> | AP2 domain-containing transcription factor, putative                                                                                  | NA |
| <b>At4g39780</b> | PLL4 (POLTERGEIST LIKE 4); protein serine/threonine phosphatase                                                                       | NA |
| <b>At2g28890</b> | NRT1.1 (NITRATE TRANSPORTER 1.1)                                                                                                      | NA |
| <b>At1g12110</b> | ATPP2-A9 (Phloem protein 2-A9); carbohydrate binding                                                                                  | NA |
| <b>At1g31200</b> | WRKY54 (WRKY DNA-binding protein 54)                                                                                                  | NA |
| <b>At2g40750</b> | CIPK23 (CBL-INTERACTING PROTEIN KINASE 23)                                                                                            | NA |
| <b>At1g30270</b> | similar to unknown protein                                                                                                            | NA |
| <b>At5g62900</b> | heat shock protein-related                                                                                                            | NA |
| <b>At5g54660</b> | ROT3 (ROTUNDIFOLIA 3); oxygen binding / steroid hydroxylase                                                                           | NA |
| <b>At4g36380</b> | transaldolase, putative                                                                                                               | 1  |
| <b>At5g13420</b> | DIT1 (DICARBOXYLATE TRANSPORTER 1); oxoglutarate:malate antiporter                                                                    | 1  |
| <b>At5g12860</b> | ATRFNR1 (ROOT FNR 1); oxidoreductase                                                                                                  | 1  |
| <b>At4g05390</b> | ATFD3 (FERREDOXIN 3); electron carrier                                                                                                | 1  |
| <b>At2g27510</b> | pyruvate kinase, putative                                                                                                             | 1  |
| <b>At2g36580</b> | aconitate hydratase, cytoplasmic, putative / citrate hydro-lyase/aconitase, putative                                                  | 1  |
| <b>At4g26970</b> | 6-phosphogluconate dehydrogenase family protein                                                                                       | 1  |
| <b>At1g64190</b> | monodehydroascorbate reductase, putative                                                                                              | 1  |
| <b>At1g63940</b> | NIA1 (NITRATE REDUCTASE 1)                                                                                                            | 1  |
| <b>At1g77760</b> | transketolase, putative                                                                                                               | 1  |
| <b>At3g60750</b> |                                                                                                                                       | 1  |

|                  |                                                                                                                           |       |
|------------------|---------------------------------------------------------------------------------------------------------------------------|-------|
| <b>At1g68670</b> | myb family transcription factor                                                                                           | 6     |
| <b>At3g24520</b> | AT-HSFC1 (Arabidopsis thaliana heat shock transcription factor C1)                                                        | 6     |
| <b>At2g17820</b> | ATHK1 (HISTIDINE KINASE 1)                                                                                                | 6     |
| <b>At3g49940</b> | LBD38 (LOB DOMAIN-CONTAINING PROTEIN 38)                                                                                  | 16    |
| <b>At1g73600</b> | phosphoethanolamine N-methyltransferase                                                                                   | 16    |
| <b>At4g34760</b> | auxin-responsive family protein                                                                                           | 16    |
| <b>At2g15620</b> | NIR1 (NITRITE REDUCTASE); ferredoxin-nitrate reductase                                                                    | 19    |
| <b>At4g36010</b> | pathogenesis-related thaumatin family protein                                                                             | 19    |
| <b>At1g64140</b> | similar to unknown protein                                                                                                | 19    |
| <b>At4g34740</b> | ATASE2 (GLN PHOSPHORIBOSYL PYROPHOSPHATE AMIDOTRANSFERASE 2);<br>amidophosphoribosyltransferase                           | 19    |
| <b>At5g39590</b> | similar to unknown protein                                                                                                | 19    |
| <b>At5g42990</b> | UBC18 (UBIQUITIN-CONJUGATING ENZYME 18)                                                                                   | 19    |
| <b>At3g58610</b> | ketol-acid reductoisomerase                                                                                               | 19    |
| <b>At1g74660</b> | MIF1 (MINI ZINC FINGER 1)                                                                                                 | 20    |
| <b>At4g18340</b> | glycosyl hydrolase family 17 protein                                                                                      | 20    |
| <b>At1g15550</b> | GA4 (GA REQUIRING 4); gibberellin 3-beta-dioxygenase                                                                      | 20    |
| <b>At4g31730</b> | GDU1 (GLUTAMINE DUMPER 1)                                                                                                 | 20    |
| <b>At1g78000</b> | SULTR1;2 (SULFATE TRANSPORTER 1;2)                                                                                        | 20    |
| <b>At5g01340</b> | mitochondrial substrate carrier family protein<br>LSP1 (LOSS OF SUSCEPTIBILITY TO POTYVIRUSES); RNA binding / translation | 1,6   |
| <b>At5g35620</b> | initiation factor                                                                                                         | 1,16  |
| <b>At3g02910</b> | Identical to UPF0131 protein                                                                                              | 1,20  |
| <b>At2g26980</b> | CIPK3 (CBL-INTERACTING PROTEIN KINASE 3)                                                                                  | 6,19  |
| <b>At1g70780</b> | similar to unknown protein                                                                                                | 6,19  |
| <b>At2g43760</b> | molybdopterin biosynthesis MoeA family protein                                                                            | 6,19  |
| <b>At3g46640</b> | PCL1 (PHYTOCLOCK 1)                                                                                                       | 6,19  |
| <b>At4g02920</b> | similar to unknown protein                                                                                                | 16,19 |
| <b>At1g32920</b> | similar to unknown protein                                                                                                | 16,19 |
| <b>At2g16660</b> | nodulin family protein                                                                                                    | 16,20 |
| <b>At4g02380</b> | SAG21 (SENESCENCE-ASSOCIATED GENE 21)                                                                                     | 16,20 |
| <b>At5g03380</b> | heavy-metal-associated domain-containing protein                                                                          | 19,20 |
| <b>At5g51830</b> | pfkB-type carbohydrate kinase family protein                                                                              | 19,20 |

**Additional Table 4: Results of N/H Biclustering.** Biclustering results for nitrate responsive genes from N-bicluster 9 biclustered over hormone treatment conditions. Rows highlighted in yellow met the criterion of having >50% reproducibility across bicluster experiments and a >1.5 fold change over reproducible bicluster experiments. The table indicates the bicluster number, the number of experiments; the percentage of those experiments that were replicates of each other (e.g. reproducible response); the number of genes in the bicluster; a description of the experimental treatment conditions supported by replicate experiments in the bicluster (with the genotype of the treated plants in parenthesis); and the tissue in which the treatment was performed. Details on the treatment conditions can be found on the NASC website (Craigon et al., 2004).

| Bicluster | # of Expt | # Rep. Expt | # of Genes | Hormone Treatment Replicated in Bicluster                                                          | Tissue                 |
|-----------|-----------|-------------|------------|----------------------------------------------------------------------------------------------------|------------------------|
| 20        | 6         | 83.33%      | 11         | Cytokinin Treatment (WT and ARR10/12 DM)                                                           | Roots                  |
| 6         | 7         | 71.43%      | 8          | Cytokinin Treatment (WT and ARR10/12 DM)                                                           | Roots                  |
| 16        | 9         | 55.56%      | 8          | Cytokinin (WT and ARR10/12 DM)                                                                     | Shoots                 |
| 17        | 8         | 50.00%      | 11         | Methyl Jasmonate (WT)                                                                              | Seedlings              |
| 1         | 4         | 50.00%      | 13         | ABA (WT)                                                                                           | Seed(Imbibition Stage) |
| 19        | 4         | 50.00%      | 15         | ABA (WT)                                                                                           | Seed(Imbibition Stage) |
| 11        | 16        | 37.50%      | 5          | Brassinolide(det2-1 mutant),<br>Brassinosteroids (WT)                                              | Seedlings              |
| 4         | 8         | 37.50%      | 8          | Cytokinin Treatment (WT)                                                                           | Seedlings              |
| 7         | 11        | 36.36%      | 8          | Cytokinin Treatment (AtIPT8/pga22 Gain of Function Mutant)                                         | Root Apex              |
| 21        | 11        | 36.36%      | 5          | Cytokinin(ARR10/12 DM), Ethylene Inhibitors (WT)                                                   | Shoots, Seedlings      |
| 12        | 12        | 33.33%      | 7          | Cytokinin Treatment (AtIPT8/pga22 Gain of Function Mutant)                                         | Root Apex              |
| 5         | 6         | 33.33%      | 8          | Cytokinin Treatment (ARR22-OX)                                                                     | Seedlings              |
| 18        | 21        | 28.57%      | 5          | Brassinolide (WT), Brassinosteroids (WT)                                                           | Seedlings              |
| 15        | 7         | 28.57%      | 8          | IAA (WT)                                                                                           | Seedlings              |
| 9         | 33        | 24.24%      | 5          | Brassinosteroids (WT), Ibuprofen (WT), GA3 (ga1-5 mutant)                                          | Seedlings              |
| 3         | 20        | 20.00%      | 5          | Cytokinin Treatment (AtIPT8/pga22 Gain of Function Mutant), GA3 Inhibitors (WT)                    | Root Apex, Seedlings   |
| 13        | 41        | 19.51%      | 5          | Cytokinin(WT and ARR10/12 DM), Brassinosteroids (WT), Daminozide (WT), GA3 Inhibitors (WT)         | Shoots, Seedlings      |
| 0         | 31        | 19.35%      | 6          | Brassinosteroids (WT), Ethylene Inhibitors (WT)                                                    | Seedlings              |
| 14        | 31        | 19.35%      | 6          | Daminozide (Ethylene Inhibitor), Salicylic Acid (Methyl Jasmonate Inhibitor), Auxin Inhibitor (WT) | Seedlings              |
| 10        | 11        | 18.18%      | 8          | Cytokinin Treatment (WT)                                                                           | Seedlings              |
| 2         | 13        | 15.38%      | 6          | IAA (WT)                                                                                           | Seedlings              |
| 8         | 6         | 0.00%       | 10         | NA                                                                                                 | NA                     |

**Additional Table 5: Significant H-biclusters Over-represented Functional Categories.** Comparison of functional representation higher frequency in the H-biclusters gene list when compared to the full N-bicluster 9 frequency as a background.

| <b>Bicluster</b> | <b>Significant Term(s)</b>                    | <b>P-value</b>  |
|------------------|-----------------------------------------------|-----------------|
| <b>1</b>         | <b>ENERGY</b>                                 | <b>0.010743</b> |
|                  | <b>Pentose phosphate pathway</b>              | <b>0.038966</b> |
|                  | <b>C compound and carbohydrate metabolism</b> | <b>0.034179</b> |
|                  | <b>PLASTID</b>                                | <b>0.018203</b> |
|                  | <b>PHOTOSYNTHESIS</b>                         | <b>0.043716</b> |
|                  | <b>BIOGENESIS OF CELLULAR COMPONENTS</b>      | <b>0.018203</b> |
|                  | <b>UNCLASSIFIED PROTEINS</b>                  | <b>0.036409</b> |
| <b>6</b>         | <b>None</b>                                   | <b>NA</b>       |
| <b>16</b>        | <b>CLASSIFICATION NOT YET CLEAR CUT</b>       | <b>0.017727</b> |
| <b>19</b>        | <b>PROTEIN FATE</b>                           | <b>0.03613</b>  |
| <b>20</b>        | <b>None</b>                                   | <b>NA</b>       |

**Additional Table 6: Hormone Microarray Datasets:** A list of all NASC (Craigon et al 2004) microarray datasets used for N/H biclustering. Indicated in this table is the description of the dataset from the NASC database, the number of chips in the total microarray dataset and the author of the microarray dataset. Only those experiments having to do with hormone treatments or relative control treatments were used in this study.

| NASC Microarray Dataset Name                                                   | # of Chips | Reference        |
|--------------------------------------------------------------------------------|------------|------------------|
| AtGenExpress: ACC time course in wildtype seedlings                            | 12         | Yoshida          |
| AtGenExpress: Zeatin time course in wildtype seedlings                         | 12         | Yoshida          |
| AtGenExpress: Methyl Jasmonate time course in wildtype seedlings               | 12         | Yoshida          |
| AtGenExpress: IAA time course in wildtype seedlings                            | 12         | Yoshida          |
| AtGenExpress: ABA time course in wildtype seedlings                            | 12         | Yoshida          |
| AtGenExpress: GA3 time course in wildtype and ga1-5 mutant seedlings           | 24         | Yoshida          |
| AtGenExpress: Brassinolide time course in wildtype and det2-1 mutant seedlings | 24         | Yoshida          |
| AtGenExpress: Effect of Brassinosteroids on seedlings                          | 26         | Yoshida          |
| AtGenExpress: Cytokinin treatment of seedlings                                 | 12         | Mizuno           |
| AtGenExpress: Effect of ABA during seed imbibition                             | 8          | Kamiya & Nambara |
| AtGenExpress: Basic hormone treatment of seeds                                 | 12         | Yamaguchi        |
| AtGenExpress: Effect of gibberellic acid inhibitors on seedlings               | 20         | Yoshida          |
| AtGenExpress: Effect of auxin inhibitors on seedlings                          | 10         | Yoshida          |
| AtGenExpress: Effect of brassinosteroid inhibitors on seedlings                | 12         | Yoshida          |
| AtGenExpress: Effect of ethylene inhibitors on seedlings                       | 6          | Yoshida          |
| AtGenExpress: Effect of ibuprofen, salicylic acid and daminozide on seedlings  | 8          | Yoshida          |
| Cytokinin treatment on Roots and Shoots                                        | 24         | Sakakibara       |
| Gibberellin and ethylene cross-talk                                            | 18         | De_Grauwe        |
| Auxin/cytokinin crosstalk in the Arabidopsis primary root apex                 | 14         | Ljung            |
