# Supplementary material for: A system biology approach highlights a hormonal enhancer effect on regulation of genes in a nitrate responsive "biomodule"
Source: PubMed Central journal article supplement (PMC2702358; doi:10.1186/1752-0509-3-59), 2009-06-06
Supplement: 1752-0509-3-59-S2.pdf [file 1752-0509-3-59-S2.pdf]

```
#####
#####
R output for ANOVA Model Simplification based on the Crawley Method
(Crawley 2005)
#####
#####
```

```
##Important Note: All overlapping genes from the N/H biclusters in the
group factor were removed before this analysis was done
```

```
> NRF <- as.data.frame(read.table("NR_data_for_R.txt", header =
TRUE))## Data file with NR double mutant data (Wang et al 2004)
>
> NRF$Treatment<-factor(NRF$Treatment)##Defning treatment factor
> NRF$Mutant<-factor(NRF$Mutant)## Defining Genotype Factor
> NRF$Group<-factor(NRF$Group)## Defining N/H-bicluster Factor
> NRF$Tissue<-factor(NRF$Tissue)## Defining Tissue Factor
> attach(NRF)## attaching the data frame to the R workspace
> levels(Treatment)
[1] "Treated" "Control"
>levels(Mutant)
[1] "Plus" "Minus"## Plus = mutant, Minus= WT
>levels(Group)
[1] "0" "1" "16" "19" "20" ## where 1, 16, 19 and 20 corresponde to
N/H ##biclusters 1, 16, 19, and 20 and 0 corresponds to N-bicluster 9
exclusive ##genes
>levels(Tissue)
[1] "Shoots" "Roots"
```

```
##First model showing all the factors of interest for this analysis
```

```
> lmout<-lm(Expression~Group+Treatment+Tissue+Mutant+Group:Treatment)##
Defining the ANOVA model
> summary.lm(lmout)## performing ANOVA using the model defined above
```

```
##Results For First Model, note the high p-values for the tissue and
mutant ##categories. The estimate is the coefficient estimate, the
error is the ##standard error, the t-value gives the t-statistic for
the null hypothesis of ##coeff = 0 and the Pr(>|t|) gives the p-value
based on the t-value. Each ##factor level uses a baseline or control
(defined as the lowest number or ##letter for each comparison.
Interactions are over and above the main effects ##of the individual
factors.
```

```
Call:
```

```
lm(formula = Expression ~ Group + Treatment + Tissue + Mutant +
    Group:Treatment)
```

```
Residuals:
```

|  | Min     | 1Q      | Median | 3Q    | Max     |
|--|---------|---------|--------|-------|---------|
|  | -5438.0 | -1281.6 | -421.1 | 153.9 | 23283.4 |

Coefficients:

|                     | Estimate | Std. Error | t value | Pr(> t ) |     |
|---------------------|----------|------------|---------|----------|-----|
| (Intercept)         | 603.31   | 237.53     | 2.540   | 0.011273 | *   |
| Group1              | 1733.79  | 424.95     | 4.080   | 4.95e-05 | *** |
| Group6              | 87.01    | 519.03     | 0.168   | 0.866912 |     |
| Group16             | 760.43   | 519.03     | 1.465   | 0.143287 |     |
| Group19             | 681.63   | 402.04     | 1.695   | 0.090378 | .   |
| Group20             | 910.45   | 454.34     | 2.004   | 0.045411 | *   |
| N-Treatment         | 1376.46  | 277.44     | 4.961   | 8.53e-07 | *** |
| Tissue              | -264.43  | 189.39     | -1.396  | 0.163034 |     |
| Mutant              | 59.54    | 189.39     | 0.314   | 0.753308 |     |
| Group1:N-Treatment  | 2103.86  | 600.97     | 3.501   | 0.000489 | *** |
| Group6:N-Treatment  | -604.19  | 734.02     | -0.823  | 0.410681 |     |
| Group16:N-Treatment | 990.19   | 734.02     | 1.349   | 0.177720 |     |
| Group19:N-Treatment | 1089.91  | 568.57     | 1.917   | 0.055599 | .   |
| Group20:N-Treatment | 654.50   | 642.53     | 1.019   | 0.308681 |     |

---

Signif. codes: 0 '\*\*\*' 0.001 '\*\*' 0.01 '\*' 0.05 '.' 0.1 ' ' 1

Residual standard error: 2718 on 810 degrees of freedom  
 Multiple R-Squared: 0.2167, Adjusted R-squared: 0.2041  
 F-statistic: 17.23 on 13 and 810 DF, p-value: < 2.2e-16

##Second model: We simplify one step at a time in order to see the effects of ##removing individual factors. The mutant factor is removed because its p-value ##is highest.

```
> lmout1<-lm(Expression~Group+Treatment+Tissue+Group:Treatment)
> summary.lm(lmout1)
```

Call:

```
lm(formula = Expression ~ Group + Treatment + Tissue + Group:Treatment)
```

Residuals:

|  | Min     | 1Q      | Median | 3Q    | Max     |
|--|---------|---------|--------|-------|---------|
|  | -5467.8 | -1268.6 | -431.0 | 162.7 | 23253.6 |

Coefficients:

|                     | Estimate | Std. Error | t value | Pr(> t ) |     |
|---------------------|----------|------------|---------|----------|-----|
| (Intercept)         | 633.08   | 217.72     | 2.908   | 0.003739 | **  |
| Group1              | 1733.79  | 424.72     | 4.082   | 4.90e-05 | *** |
| Group6              | 87.01    | 518.75     | 0.168   | 0.866839 |     |
| Group16             | 760.43   | 518.75     | 1.466   | 0.143065 |     |
| Group19             | 681.63   | 401.82     | 1.696   | 0.090199 | .   |
| Group20             | 910.45   | 454.08     | 2.005   | 0.045291 | *   |
| N-Treatment         | 1376.46  | 277.28     | 4.964   | 8.41e-07 | *** |
| Tissue              | -264.43  | 189.29     | -1.397  | 0.162800 |     |
| Group1:N-Treatment  | 2103.86  | 600.64     | 3.503   | 0.000486 | *** |
| Group6:N-Treatment  | -604.19  | 733.62     | -0.824  | 0.410421 |     |
| Group16:N-Treatment | 990.19   | 733.62     | 1.350   | 0.177478 |     |

```

Group19:N-Treatment  1089.91    568.26   1.918 0.055463 .
Group20:N-Treatment   654.50    642.17   1.019 0.308412

```

---

```

Signif. codes:  0 '***' 0.001 '**' 0.01 '*' 0.05 '.' 0.1 ' ' 1

```

```

Residual standard error: 2717 on 811 degrees of freedom
Multiple R-Squared:  0.2166,    Adjusted R-squared:  0.205
F-statistic: 18.68 on 12 and 811 DF,  p-value: < 2.2e-16

```

##Comparison of first and second model, showing that the new model is not significantly worse in its explanatory power than the model with additional factors (based on p-value 0.7533) and therefore the model simplification is justified

```

> anova(lmout,lmout1)
Analysis of Variance Table

```

```

Model 1: Expression ~ Group + Treatment + Tissue + Mutant +
Group:Treatment
Model 2: Expression ~ Group + Treatment + Tissue+ Group:Treatment
  Res.Df      RSS Df Sum of Sq    F Pr(>F)
1     810 5985212769
2     811 5985943108  -1    -730339 0.0988 0.7533

```

##Third model with tissue factor removed from model 2 above due to its high  
##p-value

```

> lmout2<-lm(Expression~Group+Treatment+Group:Treatment)
> summary.lm(lmout2)

```

```

Call:
lm(formula = Expression ~ Group + Treatment + Group:Treatment)

```

```

Residuals:
    Min       1Q   Median       3Q      Max
-5335.6 -1291.4  -419.8   181.9 23385.8

```

```

Coefficients:
              Estimate Std. Error t value Pr(>|t|)
(Intercept)      500.86    196.18   2.553 0.010860 *
Group1           1733.79    424.96   4.080 4.95e-05 ***
Group6             87.01    519.05   0.168 0.866916
Group16           760.43    519.05   1.465 0.143298
Group19           681.63    402.05   1.695 0.090387 .
Group20           910.45    454.35   2.004 0.045416 *
N-Treatment      1376.46    277.44   4.961 8.54e-07 ***
Group1:N-Treatment 2103.86    600.99   3.501 0.000489 ***
Group6:N-Treatment -604.19    734.05  -0.823 0.410695
Group16:N-Treatment  990.19    734.05   1.349 0.177731
Group19:N-Treatment 1089.91    568.59   1.917 0.055606 .
Group20:N-Treatment  654.50    642.55   1.019 0.308695

```

---

Signif. codes: 0 '\*\*\*' 0.001 '\*\*' 0.01 '\*' 0.05 '.' 0.1 ' ' 1

Residual standard error: 2718 on 812 degrees of freedom  
Multiple R-Squared: 0.2147, Adjusted R-squared: 0.204  
F-statistic: 20.18 on 11 and 812 DF, p-value: < 2.2e-16

##Based on ANOVA results the model simplification seems justified.  
Model ##simplification is continued combining factor levels in the N/H  
bicluster ##factor begins to see if the model can be further simplified  
by removing factor ##levels with high p-values.

```
> levels(Group)## showing group levels
[1] "0" "1" "6" "16" "19" "20"
> GroupA=Group## defining a new N/H bicluster group factor levels by
merging ##levels that are not significantly different from each other.
We begin by ##joining levels 0 and 6 of the group factor to form level
06.
> levels(GroupA)[3]="0.6"## setting N/H bicluster 6 to the baseline as
it is ##most similar to the N-bicluster 9 exclusive
> levels(GroupA)##new levels for the group
[1] "0.6" "1" "16" "19" "20"
```

## Fourth ANOVA model using revised N/H bicluster factor group factor  
levels. Some N/H biclusters are still not shown to be significant  
> lmout3<-lm(Expression~GroupA+Treatment+GroupA:Treatment)  
> summary.lm(lmout3)

Call:

```
lm(formula = Expression ~ GroupA + Treatment + GroupA:Treatment)
```

Residuals:

|  | Min     | 1Q      | Median | 3Q    | Max     |
|--|---------|---------|--------|-------|---------|
|  | -5335.6 | -1282.0 | -426.9 | 176.1 | 23459.7 |

Coefficients:

|                      | Estimate | Std. Error | t value | Pr(> t ) |     |
|----------------------|----------|------------|---------|----------|-----|
| (Intercept)          | 513.3    | 181.5      | 2.828   | 0.004803 | **  |
| GroupA1              | 1721.4   | 418.2      | 4.116   | 4.24e-05 | *** |
| GroupA16             | 748.0    | 513.4      | 1.457   | 0.145530 |     |
| GroupA19             | 669.2    | 394.9      | 1.695   | 0.090546 | .   |
| GroupA20             | 898.0    | 448.0      | 2.005   | 0.045339 | *   |
| N-Treatment          | 1290.1   | 256.7      | 5.026   | 6.17e-07 | *** |
| GroupA1:N-Treatment  | 2190.2   | 591.4      | 3.703   | 0.000227 | *** |
| GroupA16:N-Treatment | 1076.5   | 726.1      | 1.483   | 0.138563 |     |
| GroupA19:N-Treatment | 1176.2   | 558.5      | 2.106   | 0.035507 | *   |
| GroupA20:N-Treatment | 740.8    | 633.5      | 1.169   | 0.242624 |     |

---

Signif. codes: 0 '\*\*\*' 0.001 '\*\*' 0.01 '\*' 0.05 '.' 0.1 ' ' 1

Residual standard error: 2717 on 814 degrees of freedom  
Multiple R-Squared: 0.2137, Adjusted R-squared: 0.205  
F-statistic: 24.58 on 9 and 814 DF, p-value: < 2.2e-16

```
##Comparison of ANOVA models, showing that the new model is not
significantly ##worse in its explanatory power than the model with
additional factors (based ##on p-value 0.6004) and therefore the model
simplification is justified
```

```
> anova(lmout2,lmout3)
Analysis of Variance Table
```

```
Model 1: Expression ~ Group + Treatment + Group:Treatment
Model 2: Expression ~ GroupA + Treatment + GroupA:Treatment
  Res.Df      RSS   Df Sum of Sq    F Pr(>F)
1     812 6000347497
2     814 6007891685  -2   -7544188 0.5105 0.6004
```

```
## Further model simplification of the N/H biclusters with N/H
biclusters 16 ##and 19 combined because their estimated main effects
are close to each other ##compared to the standard error of their means
```

```
> levels(GroupA)
[1] "0.6" "1" "16" "19" "20"
> GroupB=GroupA
> levels(GroupB)
[1] "0.6" "1" "16" "19" "20"
> levels(GroupB) [3:4]="1619"
> levels(GroupB)
[1] "0.6" "1" "1619" "20"
```

```
##Fifth ANOVA model with second revision of N/H bicluster factor. This
model ##shows a statistically significant difference between all
comparisons except ##for N/H bicluster 20 given nitrate treatment
```

```
> lmout4<-lm(Expression~GroupB+Treatment+GroupB:Treatment)
> summary.lm(lmout4)
```

```
Call:
lm(formula = Expression ~ GroupB + Treatment + GroupB:Treatment)
```

```
Residuals:
    Min       1Q   Median       3Q      Max
-5335.6 -1282.0  -422.0   176.1 23459.7
```

```
Coefficients:
              Estimate Std. Error t value Pr(>|t|)
(Intercept)      513.3      181.3   2.831 0.004752 **
GroupB1          1721.4      417.7   4.121 4.15e-05 ***
GroupB1619        696.6      336.0   2.073 0.038466 *
GroupB20          898.0      447.4   2.007 0.045078 *
N-Treatment      1290.1      256.4   5.032 5.98e-07 ***
GroupB1:N-Treatment 2190.2      590.7   3.708 0.000223 ***
GroupB1619:N-Treatment 1141.5      475.2   2.402 0.016515 *
GroupB20:N-Treatment 740.8      632.8   1.171 0.242051
---
```

```
Signif. codes:  0 '***' 0.001 '**' 0.01 '*' 0.05 '.' 0.1 ' ' 1
```

Residual standard error: 2713 on 816 degrees of freedom  
Multiple R-Squared: 0.2137, Adjusted R-squared: 0.2069  
F-statistic: 31.68 on 7 and 816 DF, p-value: < 2.2e-16

##Comparison of ANOVA models for the two different vestions of N/H  
bicluster ##factor showing that the new model is not significantly  
worse in its ##explanatory power than the model with additional factors  
(based on p-value ##0.9906) and therefore the model simplification is  
justified

```
> anova(lmout3,lmout4)
```

Analysis of Variance Table

Model 1: Expression ~ GroupA + Treatment + GroupA:Treatment

Model 2: Expression ~ GroupB + Treatment + GroupB:Treatment

|   | Res.Df | RSS        | Df | Sum of Sq | F      | Pr(>F) |
|---|--------|------------|----|-----------|--------|--------|
| 1 | 814    | 6007891685 |    |           |        |        |
| 2 | 816    | 6008030390 | -2 | -138706   | 0.0094 | 0.9906 |

##Further model simplification combining group factor levels for N/H  
bicluster 20 with N/H ##biclusters 16 and 19

```
> GroupC=GroupB ## redefining a new N/H bicluster factor level
```

```
> levels(GroupC)## showing levels of new N/H bicluster factor level
```

```
[1] "0.6" "1" "1619" "20"
```

```
> levels(GroupC)[3:4]="16.19.20"## combining N/H bicluster 20 with 16  
and 19
```

```
> levels(GroupC)
```

```
[1] "0.6" "1" "16.19.20"
```

##Sixth ANOVA model with revised N/H bicluster factor level, this is  
the ##final model as further simplification did not seem necessary  
given the ##results

```
> lmout5<-lm(Expression~GroupC+Treatment+GroupC:Treatment)
```

```
> summary.lm(lmout5)
```

Call:

```
lm(formula = Expression ~ GroupC + Treatment + GroupC:Treatment)
```

Residuals:

|  | Min     | 1Q      | Median | 3Q    | Max     |
|--|---------|---------|--------|-------|---------|
|  | -5335.6 | -1245.3 | -433.3 | 156.5 | 23459.7 |

Coefficients:

|                            | Estimate | Std. Error | t value | Pr(> t )     |
|----------------------------|----------|------------|---------|--------------|
| (Intercept)                | 513.3    | 181.1      | 2.834   | 0.00471 **   |
| GroupC1                    | 1721.4   | 417.3      | 4.125   | 4.08e-05 *** |
| GroupC16.19.20             | 761.8    | 294.7      | 2.585   | 0.00990 **   |
| N-Treatment                | 1290.1   | 256.1      | 5.037   | 5.82e-07 *** |
| GroupC1:N-Treatment        | 2190.2   | 590.1      | 3.712   | 0.00022 ***  |
| GroupC16.19.20:N-Treatment | 1011.9   | 416.7      | 2.428   | 0.01539 *    |

---

Signif. codes: 0 '\*\*\*' 0.001 '\*\*' 0.01 '\*' 0.05 '.' 0.1 ' ' 1

Residual standard error: 2711 on 818 degrees of freedom

Multiple R-Squared: 0.2134, Adjusted R-squared: 0.2086

F-statistic: 44.37 on 5 and 818 DF, p-value: < 2.2e-16

> anova(lmout4,lmout5)## comparison of the final model with the previous model showing that the new model is not significantly worse in its explanatory power than the model with additional factors (based on p-value 0.8502) and therefore the model simplification is justified

Analysis of Variance Table

Model 1: Expression ~ GroupB + Treatment + GroupB:Treatment

Model 2: Expression ~ GroupC + Treatment + GroupC:Treatment

|   | Res.Df | RSS        | Df | Sum of Sq | F      | Pr(>F) |
|---|--------|------------|----|-----------|--------|--------|
| 1 | 816    | 6008030390 |    |           |        |        |
| 2 | 818    | 6010420271 | -2 | -2389881  | 0.1623 | 0.8502 |

## The final model here has the greatest explanatory power with all factors and ##factor levels called significant. Therefore this model is the simplest model ##that can be derived from the initial model.
